# Supplementary material for: Putative enhancer sites in the bovine genome are enriched with variants affecting complex traits
Source: Genet Sel Evol. 2017 Jul 6;49:56. doi: 10.1186/s12711-017-0331-4 (PMC5499214; doi:10.1186/s12711-017-0331-4)
Supplement: Supplementary file 4 — Additional file 4: Table S1. Properties of GSEA core SNPs in the Villar (H3K4me3 and H3K27ac) enhancer sets. The proportion of significant GSEA core SNPs in the H3K27ac set doubled when the P value threshold decreased from 10−8 to 10−5 whereas the proportion of GSEA core SNPs in the H3K4me3 set did not increase as much. [file 12711_2017_331_MOESM4_ESM.xlsx]

## Sheet: Sheet1
phenotype	enhancer set	the number of significant GSEA core SNPs (P≤10e-08)	the number of significant GSEA core SNPs (P≤10e-05)	the number of GSEA core SNPs	the number of enhancer SNPs	the number of SNPs in a phenotype cohort	ratio of the number of significant GSEA core SNPs (P≤10e-08) to the number of GSEA core SNPs	ratio of the number of significant GSEA core SNPs (P≤10e-05) to the number of GSEA core SNPs	ratio of the number of GSEA core SNPs to the number of enhancer SNPs	ratio of the number of GSEA core SNPs to the number of SNPs in a phenotype cohort	ratio of the number of enhancer SNPs to the number of SNPs in a phenotype cohort
FY	H3K4me3	260	406	85240	302659	23462606	0.00305021	0.00476302	0.281637	0.00363302	0.0129
	H3K27ac	419	853	281885	771827		0.00148642	0.00302606	0.365218	0.012	0.0329
MY	H3K4me3	273	473	88005	302659	23455977	0.0031021	0.00537469	0.290773	0.0038	0.0129
	H3K27ac	538	1175	270649	771614		0.00198781	0.00434142	0.350757	0.0115	0.0329
PY	H3K4me3	191	393	88440	302659	23470573	0.00215966	0.00444369	0.29221	0.0038	0.0129
	H3K27ac	289	870	277763	772191		0.00104046	0.00313217	0.359708	0.0118	0.0329
