# Supplementary material for: Putative enhancer sites in the bovine genome are enriched with variants affecting complex traits
Source: Genet Sel Evol. 2017 Jul 6;49:56. doi: 10.1186/s12711-017-0331-4 (PMC5499214; doi:10.1186/s12711-017-0331-4)
Supplement: Supplementary file 6 — Additional file 6: Table S3. Number of significant enhancer SNPs (P ≤ 10−8) that remained on chromosome 14 after correcting for the effect of the well-known DGAT1 mutation. [file 12711_2017_331_MOESM6_ESM.xlsx]

## Sheet: Sheet1
phenotype	database	the number of significant SNPs on Chromosome 14 before correcting DGAT1 effects	the number of significant SNPs on Chromosome 14 after correcting DGAT1 effects
FY	Total*	6517	2091
	FANTOM5	3	0
	VISTA	1	0
	Villar H3K4me3	252	130
	Villar H3K27ac	394	201
	dbSUPER	18	12
MY	Total*	8976	3025
	FANTOM5	8	0
	VISTA	8	0
	Villar H3K4me3	270	139
	Villar H3K27ac	503	296
	dbSUPER	38	17
PY	Total*	4087	795
	VISTA	NA	0
	FANTOM5	1	0
	Villar H3K4me3	190	65
	Villar H3K27ac	273	118
	dbSUPER	18	11
Note: *Total is the number of all significant SNPs on chromosome 14, independent of within enhancer set or not.
