# Supplementary material for: Putative enhancer sites in the bovine genome are enriched with variants affecting complex traits
Source: Genet Sel Evol. 2017 Jul 6;49:56. doi: 10.1186/s12711-017-0331-4 (PMC5499214; doi:10.1186/s12711-017-0331-4)
Supplement: Supplementary file 7 — Additional file 7: Table S4. SNPs highlighted in previous studies [38, 55] that were also our GSEA core SNPs in the Villar (H3K4me3 and H3K7ac) sets. [file 12711_2017_331_MOESM7_ESM.xlsx]

## Sheet: try
chromosome	position of core GSEA SNPs	SNP effect output from meta-analysis	variance output from meta-analysis	P-value output from meta-analysis	phenotype	histone marker
5	93954751	-2.4835	0.279149	2.22045e-30	FY	H3K27ac
5	93954751	61.9095	8.04794	1.44329e-14	MY	H3K27ac
5	93948357	-2.21792	0.296787	7.83817e-14	FY	H3K27ac
5	93948357	-2.21792	0.296787	7.83817e-14	FY	H3K4me3
5	93949810	-2.04196	0.30979	4.35634e-11	FY	H3K27ac
5	93949810	-2.04196	0.30979	4.35634e-11	FY	H3K4me3
5	93948646	-1.66029	0.281577	3.7155e-09	FY	H3K27ac
5	93948646	-1.66029	0.281577	3.7155e-09	FY	H3K4me3
5	93948804	-1.6332	0.280867	6.06834e-09	FY	H3K27ac
5	93948804	-1.6332	0.280867	6.06834e-09	FY	H3K4me3
5	93947761	-1.61068	0.282753	1.22338e-08	FY	H3K27ac
5	93947761	-1.61068	0.282753	1.22338e-08	FY	H3K4me3
5	93947989	-1.5879	0.282745	1.95417e-08	FY	H3K27ac
5	93947989	-1.5879	0.282745	1.95417e-08	FY	H3K4me3
5	93948718	-1.30793	0.272764	1.62587e-06	FY	H3K27ac
5	93948718	-1.30793	0.272764	1.62587e-06	FY	H3K4me3
5	93948725	-1.30793	0.272764	1.62587e-06	FY	H3K27ac
5	93948725	-1.30793	0.272764	1.62587e-06	FY	H3K4me3
5	93948357	40.4197	8.76785	4.02697e-06	MY	H3K27ac
5	93948357	40.4197	8.76785	4.02697e-06	MY	H3K4me3
5	93947989	37.1569	8.23566	6.43066e-06	MY	H3K27ac
5	93947989	37.1569	8.23566	6.43066e-06	MY	H3K4me3
5	93949810	40.8641	9.09542	7.02842e-06	MY	H3K27ac
5	93949810	40.8641	9.09542	7.02842e-06	MY	H3K4me3
5	93947761	36.6948	8.25964	8.88499e-06	MY	H3K27ac
5	93947761	36.6948	8.25964	8.88499e-06	MY	H3K4me3
5	93948804	35.8009	8.22846	1.35604e-05	MY	H3K27ac
5	93948804	35.8009	8.22846	1.35604e-05	MY	H3K4me3
5	93948646	35.8386	8.26111	1.43637e-05	MY	H3K27ac
5	93948646	35.8386	8.26111	1.43637e-05	MY	H3K4me3
5	93954751	0.908693	0.239456	0.000147744	PY	H3K27ac
5	93948718	27.3558	8.20764	0.000859258	MY	H3K27ac
5	93948718	27.3558	8.20764	0.000859258	MY	H3K4me3
5	93948725	27.3558	8.20764	0.000859258	MY	H3K27ac
5	93948725	27.3558	8.20764	0.000859258	MY	H3K4me3
5	93949810	0.889599	0.268463	0.000920769	PY	H3K27ac
5	93949810	0.889599	0.268463	0.000920769	PY	H3K4me3
5	93948357	0.823356	0.262364	0.00169977	PY	H3K27ac
5	93948357	0.823356	0.262364	0.00169977	PY	H3K4me3
5	93947989	0.740454	0.245294	0.00253915	PY	H3K27ac
5	93947989	0.740454	0.245294	0.00253915	PY	H3K4me3
5	93947761	0.713296	0.247903	0.00401075	PY	H3K27ac
5	93947761	0.713296	0.247903	0.00401075	PY	H3K4me3
5	93948804	0.686014	0.248894	0.00584678	PY	H3K27ac
5	93948804	0.686014	0.248894	0.00584678	PY	H3K4me3
5	93948646	0.6843	0.250654	0.00633234	PY	H3K27ac
5	93948646	0.6843	0.250654	0.00633234	PY	H3K4me3
5	93948718	0.479756	0.301385	0.111421	PY	H3K27ac
5	93948718	0.479756	0.301385	0.111421	PY	H3K4me3
5	93948725	0.479756	0.301385	0.111421	PY	H3K27ac
5	93948725	0.479756	0.301385	0.111421	PY	H3K4me3
